# Supplementary material for: hUC-MSCs Attenuate Acute Graft-Versus-Host Disease through Chi3l1 Repression of Th17 Differentiation
Source: Hindawi journal article supplement (doi:10.1155/2022/1052166), 2022-10-12
Supplement: f1 [file 1052166.f1.pdf]

| geneid   | M        | U        | B        | P        |
|----------|----------|----------|----------|----------|
| ENSG0000 | 637.9091 | 806.6885 | 587.4434 | 266.9478 |
| ENSG0000 | 0.98243  | 0.048574 | 4.0113   | 0.912038 |
| ENSG0000 | 0.024602 | 2.241413 | 0.041762 | 0.008185 |
| ENSG0000 | 0.44379  | 7.844517 | 6.237132 | 0.269949 |
| ENSG0000 | 0.521614 | 0.022564 | 0.449184 | 3.784632 |
| ENSG0000 | 4.12728  | 7.782162 | 8.645267 | 0.271908 |
| ENSG0000 | 0.382284 | 0.040218 | 29.30471 | 0.773726 |
| ENSG0000 | 1.49379  | 0.044693 | 2.486535 | 2.722585 |
| ENSG0000 | 2.855235 | 0.360433 | 0.0266   | 11.40366 |
| ENSG0000 | 2.737668 | 0.266969 | 3.700502 | 8.070899 |
| ENSG0000 | 1.597176 | 2.646509 | 3.239013 | 0.708156 |
| ENSG0000 | 43.59145 | 4.417988 | 28.84989 | 19.60345 |
| ENSG0000 | 0.086897 | 1.42707  | 0.222762 | 0.028844 |
| ENSG0000 | 3.182227 | 0.60034  | 6.400256 | 5.590439 |
| ENSG0000 | 3.654327 | 2.028306 | 0.382428 | 0.228241 |
| ENSG0000 | 0.658667 | 2.132983 | 0.370139 | 0.049899 |
| ENSG0000 | 0.839795 | 0.989504 | 0.488042 | 0.046405 |
| ENSG0000 | 0.172176 | 0.437368 | 0.020579 | 0.008378 |
| ENSG0000 | 21.50319 | 69.06212 | 2.718341 | 6.938861 |
| ENSG0000 | 3.556456 | 19.22239 | 5.478543 | 1.325247 |
| ENSG0000 | 12.52755 | 1.685614 | 0.452353 | 10.83598 |
| ENSG0000 | 28.86772 | 67.90498 | 8.753271 | 21.93478 |
| ENSG0000 | 140.3405 | 172.0238 | 78.48527 | 56.14945 |
| ENSG0000 | 1.556393 | 2.132367 | 1.379546 | 0.415213 |
| ENSG0000 | 1.322367 | 0.96156  | 1.738383 | 2.744486 |
| ENSG0000 | 1.139772 | 1.884865 | 0.696211 | 0.1058   |
| ENSG0000 | 0.116523 | 0.462635 | 0.034697 | 0.073608 |
| ENSG0000 | 0.323574 | 1.347607 | 1.375524 | 0.079664 |
| ENSG0000 | 1.601221 | 0.009265 | 0.180173 | 3.831646 |
| ENSG0000 | 0.268    | 0.089744 | 0.065872 | 0.676252 |
| ENSG0000 | 9.624184 | 1.869933 | 9.650911 | 11.37282 |
| ENSG0000 | 43.32326 | 55.56486 | 7.268645 | 7.219056 |
| ENSG0000 | 0.375388 | 1.700188 | 0.130583 | 0.014576 |
| ENSG0000 | 0.120898 | 0.732277 | 0.517041 | 0.052051 |
| ENSG0000 | 0.233793 | 0.698422 | 0.005751 | 0.083005 |
| ENSG0000 | 4.952158 | 14.67259 | 0.510156 | 3.112738 |
| ENSG0000 | 0.022156 | 1.061767 | 0.040455 | 0.061978 |
| ENSG0000 | 16.10586 | 1.53655  | 2.109788 | 23.24918 |
| ENSG0000 | 1.016305 | 0.159628 | 0.361956 | 1.461436 |
| ENSG0000 | 0.178873 | 0.001957 | 1.992355 | 0.325525 |
| ENSG0000 | 1.892989 | 1.526877 | 2.467539 | 0.322537 |
| ENSG0000 | 2.476231 | 0.108894 | 0.238336 | 3.788999 |
| ENSG0000 | 0.388471 | 3.839364 | 8.231182 | 0.136198 |
| ENSG0000 | 0.004764 | 0.10365  | 0.024321 | 0.005025 |
| ENSG0000 | 7.439021 | 9.529159 | 11.90864 | 3.594767 |
| ENSG0000 | 0.08573  | 0.024065 | 1.447994 | 0.423654 |
| ENSG0000 | 0.004515 | 0.180875 | 0.002813 | 0.003858 |
| ENSG0000 | 30.3475  | 47.60219 | 64.83922 | 20.40497 |
| ENSG0000 | 2.129482 | 0.807173 | 3.855957 | 4.353785 |
| ENSG0000 | 5.024736 | 0.266016 | 0.482819 | 14.6955  |
| ENSG0000 | 0.048189 | 14.36602 | 0        | 0.061359 |
| ENSG0000 | 0.794284 | 0.170801 | 0.840865 | 1.211734 |
| ENSG0000 | 0.416369 | 0.162911 | 0.638999 | 0.989609 |
| ENSG0000 | 4.927102 | 1.50882  | 6.610707 | 4.801475 |
| ENSG0000 | 1.00579  | 0.023884 | 0.033383 | 5.210642 |
| ENSG0000 | 0.703524 | 0.263542 | 0.2315   | 2.521628 |
| ENSG0000 | 0.001855 | 0.081375 | 0.517278 | 0        |

|          |          |          |          |          |
|----------|----------|----------|----------|----------|
| ENSG0000 | 1.205972 | 0.205674 | 0.301157 | 2.887563 |
| ENSG0000 | 0.064252 | 0.005069 | 0.036327 | 0.113539 |
| ENSG0000 | 3.066824 | 1.038744 | 0.398409 | 4.417124 |
| ENSG0000 | 0.066576 | 0.35098  | 0.030846 | 0.037918 |
| ENSG0000 | 0.692262 | 5.981668 | 0.087668 | 0.173799 |
| ENSG0000 | 0.022072 | 0.244558 | 0.005324 | 0        |
| ENSG0000 | 0.955054 | 0.94807  | 0.071934 | 0.184716 |
| ENSG0000 | 2.91411  | 7.786633 | 1.0895   | 2.767253 |
| ENSG0000 | 0.571279 | 0.223227 | 0.003354 | 2.969957 |
| ENSG0000 | 0.039667 | 0.1681   | 0.697974 | 0.038675 |
| ENSG0000 | 32.23923 | 4.193465 | 9.548465 | 36.96387 |
| ENSG0000 | 0.22547  | 1.081806 | 0.177469 | 0.176102 |
| ENSG0000 | 4.985683 | 11.5384  | 3.013069 | 2.8172   |
| ENSG0000 | 93.47537 | 108.3542 | 209.365  | 5.025077 |
| ENSG0000 | 0.700882 | 1.491256 | 0.88699  | 0.1657   |
| ENSG0000 | 6.431283 | 6.577985 | 2.818747 | 2.91158  |
| ENSG0000 | 0.103479 | 0.04311  | 0.253597 | 1.013533 |
| ENSG0000 | 5.670619 | 8.412554 | 20.43041 | 3.574049 |
| ENSG0000 | 0.040631 | 0.446793 | 0.137955 | 0.050528 |
| ENSG0000 | 1.307926 | 7.079118 | 2.963523 | 2.592785 |
| ENSG0000 | 0.157212 | 0.671367 | 0.041542 | 0.03718  |
| ENSG0000 | 1.209357 | 0.624746 | 1.074992 | 2.453886 |
| ENSG0000 | 0.010829 | 0.11715  | 0.087996 | 0.008033 |
| ENSG0000 | 1.995905 | 0.086512 | 6.691321 | 2.541177 |
| ENSG0000 | 4.459677 | 0.417017 | 0.643977 | 4.543878 |
| ENSG0000 | 6.514776 | 4.046697 | 3.765685 | 10.19422 |
| ENSG0000 | 1.380489 | 1.101511 | 0.212028 | 0.228003 |
| ENSG0000 | 0.058032 | 0.678803 | 0.004158 | 0.049339 |
| ENSG0000 | 0.618451 | 0.044142 | 0.062438 | 1.692519 |
| ENSG0000 | 2.380668 | 1.401987 | 2.180429 | 2.914015 |
| ENSG0000 | 0.100125 | 0        | 0.002836 | 0.134915 |
| ENSG0000 | 0.727298 | 0.019382 | 0.039289 | 0.969008 |
| ENSG0000 | 0.075084 | 2.298775 | 0.301021 | 0.139012 |
| ENSG0000 | 1.667722 | 1.102376 | 2.764394 | 2.502394 |
| ENSG0000 | 0.021223 | 0.009823 | 0.19719  | 0.214035 |
| ENSG0000 | 35.24502 | 41.31088 | 231.9718 | 15.63122 |
| ENSG0000 | 1.732927 | 0.57995  | 0.57833  | 3.040074 |
| ENSG0000 | 0.752208 | 0.200004 | 7.838759 | 3.046364 |
| ENSG0000 | 0.041457 | 0.1322   | 0.53869  | 0.010898 |
| ENSG0000 | 3.509159 | 7.361781 | 1.349686 | 1.447297 |
| ENSG0000 | 6.183881 | 7.419571 | 11.6399  | 0.387219 |
| ENSG0000 | 0.114813 | 1.01705  | 0        | 0.069252 |
| ENSG0000 | 4.671345 | 6.481277 | 3.872589 | 2.720303 |
| ENSG0000 | 0.12395  | 0.008002 | 0.55043  | 0.132261 |
| ENSG0000 | 0.267148 | 1.222637 | 0.366904 | 0.098556 |
| ENSG0000 | 3.189365 | 1.9947   | 1.817159 | 0.250173 |
| ENSG0000 | 11.40094 | 0.971799 | 0.994927 | 9.691507 |
| ENSG0000 | 0.374976 | 0.035572 | 0.14995  | 0.85219  |
| ENSG0000 | 0.063396 | 0.556846 | 0        | 0        |
| ENSG0000 | 0.04893  | 0.001672 | 0.001803 | 0.161511 |
| ENSG0000 | 1.708977 | 1.116365 | 0.88981  | 3.076447 |
| ENSG0000 | 1.691331 | 3.425912 | 2.364332 | 0.392326 |
| ENSG0000 | 0.660948 | 0.259779 | 0.801904 | 1.063953 |
| ENSG0000 | 0.354882 | 0.206411 | 0.890899 | 0.776195 |
| ENSG0000 | 0.094521 | 0.398709 | 0.585892 | 0.065882 |
| ENSG0000 | 2.719152 | 0.477895 | 0.049175 | 34.63235 |
| ENSG0000 | 8.534776 | 1.840338 | 1.595569 | 14.99652 |
| ENSG0000 | 19.22864 | 7.303262 | 0.115361 | 53.79641 |

|          |          |          |          |          |
|----------|----------|----------|----------|----------|
| ENSG0000 | 0.13815  | 1.330116 | 0.732796 | 0.273338 |
| ENSG0000 | 1.53194  | 0.148103 | 0.862849 | 1.680763 |
| ENSG0000 | 0.482019 | 0.286526 | 1.502845 | 2.334839 |
| ENSG0000 | 12.40842 | 11.76496 | 31.26504 | 3.145915 |
